# Supplementary material for: Sample Preparation as a Critical Aspect of Blood Platelet Mitochondrial Respiration Measurements—The Impact of Platelet Activation on Mitochondrial Respiration
Source: MDPI journal article supplement (doi:10.3390/ijms22179332), 2021-08-28
Supplement: s1 [file s1]

**Table S1. Biochemical, blood morphology and medical characteristics of participants of the study**

| Blood morphology and biochemical parameters | women (22)         | men (7)            | together (29)      | Statistical significance | Reference ranges women | Reference ranges men |
|---------------------------------------------|--------------------|--------------------|--------------------|--------------------------|------------------------|----------------------|
| WBC (10 <sup>3</sup> /mm <sup>3</sup> )     | 5.76; 4.85-6.48    | 5.44; 4.80-6.05    | 5.69; 4.81-6.28    | n.s.                     | 3.98-10.04             | 4.23-9.07            |
| RBC (10 <sup>6</sup> /mm <sup>3</sup> )     | 4.55 ± 0.31        | 5.21 ± 0.26        | 4.71 ± 0.42        | <i>P</i> <0.0001         | 3.93-5.22              | 4.63-6.08            |
| HGB (g/dl)                                  | 13.1 ± 1.1         | 15.2 ± 0.7         | 13.6 ± 1.4         | <i>P</i> <0.0001         | 11.2-15.7              | 13.7-17.5            |
| HCT (%)                                     | 39.5 ± 2.7         | 45.1 ± 2.0         | 40.9 ± 3.5         | <i>P</i> <0.0001         | 34.1-44.9              | 40.1-51.0            |
| PLT (10 <sup>3</sup> /mm <sup>3</sup> )     | 248; 208-291       | 224; 204-257       | 239; 205-286       | n.s.                     | 182-369                | 163-337              |
| MPV (µm <sup>3</sup> )                      | 11.1; 10.4-11.7    | 10.8; 10.3-11.4    | 11.0; 10.4-11.6    | n.s.                     | 9.4-12.5               | 9.4-12.6             |
| PCT (%)                                     | 0.269; 0.237-0.317 | 0.247; 0.228-0.269 | 0.259; 0.234-0.309 | n.s.                     | 0.17-0.38              | 0.16-0.35            |
| PDW (fl)                                    | 13.1; 11.8-14.4    | 13.1; 11.8-14.1    | 13.1; 11.7-14.4    | n.s.                     | 9.8-16.2               | 9.8-16.1             |
| Lym (10 <sup>3</sup> /mm <sup>3</sup> )     | 1.97 ± 0.52        | 1.99 ± 0.39        | 1.97 ± 0.50        | n.s.                     | 1.18-3.74              | 1.32-3.57            |
| Mon (10 <sup>3</sup> /mm <sup>3</sup> )     | 0.496; 0.420-0.615 | 0.531; 0.477-0.634 | 0.500; 0.434-0.624 | n.s.                     | 0.2-0.8                | 0.2-0.8              |
| Neu (10 <sup>3</sup> /mm <sup>3</sup> )     | 3.02; 2.52-3.50    | 2.83; 2.48-3.26    | 2.97; 2.48-3.46    | n.s.                     | 1.56-6.13              | 1.78-5.38            |
| Eos (10 <sup>3</sup> /mm <sup>3</sup> )     | 0.124; 0.081-0.186 | 0.189; 0.127-0.294 | 0.134; 0.084-0.208 | n.s.                     | 0.04-0.36              | 0.04-0.54            |
| Bas (10 <sup>3</sup> /mm <sup>3</sup> )     | 0.038 ± 0.019      | 0.033 ± 0.013      | 0.037 ± 0.018      | n.s.                     | 0.01-0.08              | 0.01-0.08            |
| total cholesterol (mmol/l)                  | 4.49; 4.07-4.96    | 4.58; 4.20-5.13    | 4.50; 4.08-5.00    | n.s.                     | 3.0-5.0                | 3.0-5.0              |
| triglycerides (mmol/l)                      | 0.78; 0.63-0.99    | 0.92; 0.75-1.10    | 0.81; 0.64-1.03    | n.s.                     | <1.7                   | <1.7                 |
| HDL cholesterol (mmol/l)                    | 1.60 ± 0.32        | 1.43 ± 0.29        | 1.56 ± 0.33        | <i>P</i> =0.091*         | >1.2                   | >1.0                 |
| LDL cholesterol (mmol/l)                    | 2.52; 2.13-2.83    | 2.73; 2.39-3.24    | 2.56; 2.18-2.91    | n.s.                     | <3.0                   | <3.0                 |
| glucose (mmol/l)                            | 4.96; 4.78-5.12    | 5.07; 4.91-5.29    | 4.98; 4.80-5.17    | n.s.                     | 4.1-5.5                | 4.1-5.5              |
| uric acid (µmol/l)                          | 260 ± 49           | 325 ± 65           | 275 ± 61           | <i>P</i> =0,015          | 155-357                | 208-428              |
| creatinine (µmol/l)                         | 64.9 ± 7.7         | 84.4 ± 8.9         | 69.6 ± 11.7        | <i>P</i> <0.0001         | 49.0-90.0              | 64.0-104.0           |
| fibrinogen (mg/dl)                          | 226; 205-251       | 229; 211-263       | 225; 206-254       | n.s.                     | 150-450                | 150-450              |
| hsCRP (mg/l)                                | 1.61; 0.85-2.52    | 0.51; 0.27-1.22    | 1.19; 0.66-2.37    | <i>P</i> =0,018          | 0.0-5.0                | 0.0-5.0              |
| D-dimer (mg FEU/l)                          | 0.222; 0.152-0.321 | 0.186; 0.131-0.313 | 0.212; 0.136-0.316 | n.s.                     | 0.1-0.45               | 0.1-0.45             |
| aPTT ratio                                  | 1.008 ± 0.116      | 1.008 ± 0.112      | 1.008 ± 0.117      | n.s.                     | 0.8-1.2                | 0.8-1.2              |
| INR (PT)                                    | 1.005; 0.968-1.035 | 0.982; 0.958-1.020 | 0.999; 0.962-1.035 | n.s.                     | 0.8-1.2                | 0.8-1.2              |
| TT (sec)                                    | 17.0 ± 0.6         | 17.5 ± 0.6         | 17.1 ± 0.7         | <i>P</i> =0.047*         | 14-19                  | 14-19                |

Variables are presented as means  $\pm$  SD or medians with interquartile ranges. The two-sided or one-sided (\*) a posteriori significance of differences between women and men is given, as calculated with the bootstrap-boosted Student's t test on the Box-Cox-transformed data. Reference ranges of measured parameters, depending on gender of blood donors, presented in the last two columns, were determined with the automated Sysmex X series counter for blood morphology and Beckman Coulter AU series analyzer for other measured parameters

Abbreviations used: aPTT ratio, activated partial thromboplastin time, ratio; Bas, number of basophils; BMI, body mass index; Eos, number of eosinophils; FEU, fibrinogen equivalent unit, in D-dimer; HCT, haematocrit; HDL, high density lipoprotein cholesterol; HGB, concentration of haemoglobin; hsCRP, high-sensitivity C-reactive protein; INR, international normalized ratio for prothrombin time; LDL, low density lipoprotein cholesterol; Lym, number of lymphocytes; Mon, number of monocytes; MPV, mean platelet volume; Neu, number of neutrophils; n.s., considered 'non-significant' with a posteriori  $P > 0.1$ ; PCT, plateletcrit; PDW, platelet distribution width; PLT, platelet count; RBC, red blood cell count; TT, thrombin time; WBC, white blood cell count.

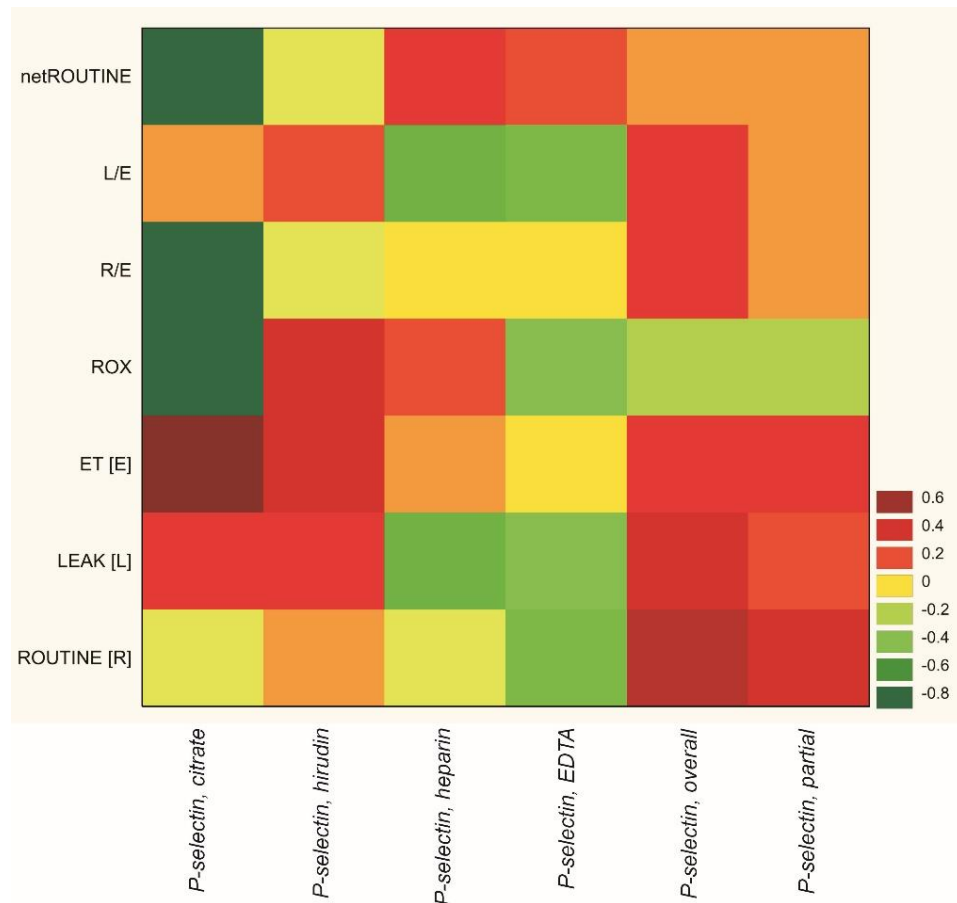

**Figure S1.** The sequential discrete contour line plot representing the “heatmap” of the associations between surface membrane P-selectin expression and mitochondrial respiration parameters and ROX for blood platelets suspended in autologous plasma obtained from blood collected from healthy donors on various anticoagulants.

The “heatmap” constructed with the use of the bootstrap-boosted overall Spearman correlation coefficients (RS) and the bootstrap-boosted partial Spearman correlation coefficients adjusted for anticoagulant type; the |RS| values > 0.310 remained significant with at least  $P < 0.05$  (for more details see the legend to Table 2 in paragraph 3.1 where numerical values are presented).

**Table S2.** Platelet P-selectin expression, platelet count and viability of platelet suspensions prepared in autologous plasma or in PBS measured after 0-3 h storage time.

| Variable                           |        | 0h (freshly prepared) | 1h                    | 2h                    | 3h                    | Significance                                                                                                                                                                                                                                |
|------------------------------------|--------|-----------------------|-----------------------|-----------------------|-----------------------|---------------------------------------------------------------------------------------------------------------------------------------------------------------------------------------------------------------------------------------------|
| P-selectin [%]                     | plasma | 7.3;<br>4.2-10.0      | 6.8;<br>5.2-11.8      | 12.2;<br>9.3-14.7     | 15.5<br>12.2-17.0     | * $P < 0.01$ for the effect of time<br>* $P < 0.01$ for the effect of time in plasma<br>*ns. for the effect of time in PBS<br>#for plasma:<br>$P < 0.05$ t1 vs. t3; $P < 0.01$ t0 vs. t3,<br>ns. t0 vs. t1, t0 vs. t2, t1 vs. t2, t2 vs. t3 |
|                                    | PBS    | 13.6;<br>9.3-26.7     | 20.8;<br>12.2-28.9    | 17.4;<br>11.7-23.5    | 22.6;<br>15.2-33.0    |                                                                                                                                                                                                                                             |
| PLT count [ $\times 10^8$ ]        | plasma | 21.15;<br>20.38-23.36 | 19.80;<br>19.00-20.83 | 19.70;<br>18.60-20.90 | 20.90;<br>19.25-23.18 | *ns. for the effect of time<br>*ns. for the effect of medium                                                                                                                                                                                |
|                                    | PBS    | 20.65;<br>19.36-22.11 | 19.00;<br>17.50-20.10 | 19.50;<br>15.93-21.25 | 19.60;<br>15.93-20.13 |                                                                                                                                                                                                                                             |
| Calcein-negative (death) cells [%] | plasma | 3.0;<br>0.2 -10.7     | 2.0;<br>0.5-13.0      | 2.4;<br>0.7-2.6       | 3.0;<br>2.2-9.0       | *ns. for the effect of time<br>*ns. for the effect of medium                                                                                                                                                                                |
|                                    | PBS    | 2.6;<br>0.1-7.8       | 3.3;<br>0.5-14.5      | 1.3;<br>0.3-0.19.2    | 4.9;<br>0.5-8.7       |                                                                                                                                                                                                                                             |

Data presented as medians and IQR; n=12. Significance of differences were estimated with (\*) Friedman's ANOVA (P-selectin expression, PLT count) and (#) the *post-hoc* Dunn's multiple comparison test.

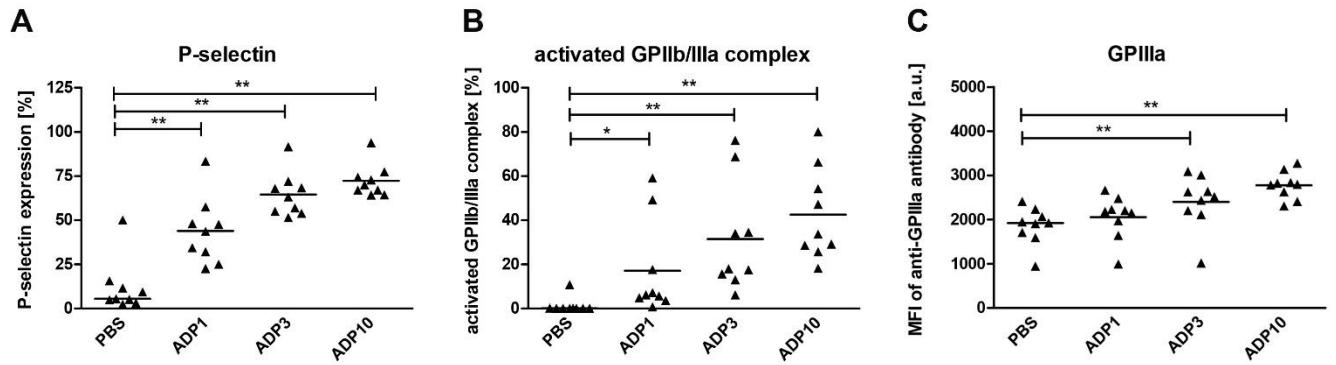

**Figure S2.** Activation of blood platelets in response to ADP stimulation.

Data presented as individual data points with medians (horizontal lines);  $n=9$  for percentage of P-selectin-positive platelets (A), GPIIb/IIIa (activated complex)-positive platelets (B) or MFI of GPIIIa-bound antibodies (C) in resting and ADP-activated platelets. Three ADP concentrations ( $1\ \mu\text{M}$ ,  $2\ \mu\text{M}$ ,  $10\ \mu\text{M}$ ) were tested compared to control (PBS). Significance of differences, as estimated with the ANOVA for repeated measures, and the *post-hoc* Dunnett's test, was:  $*P<0.05$ ,  $**P<0.001$ .

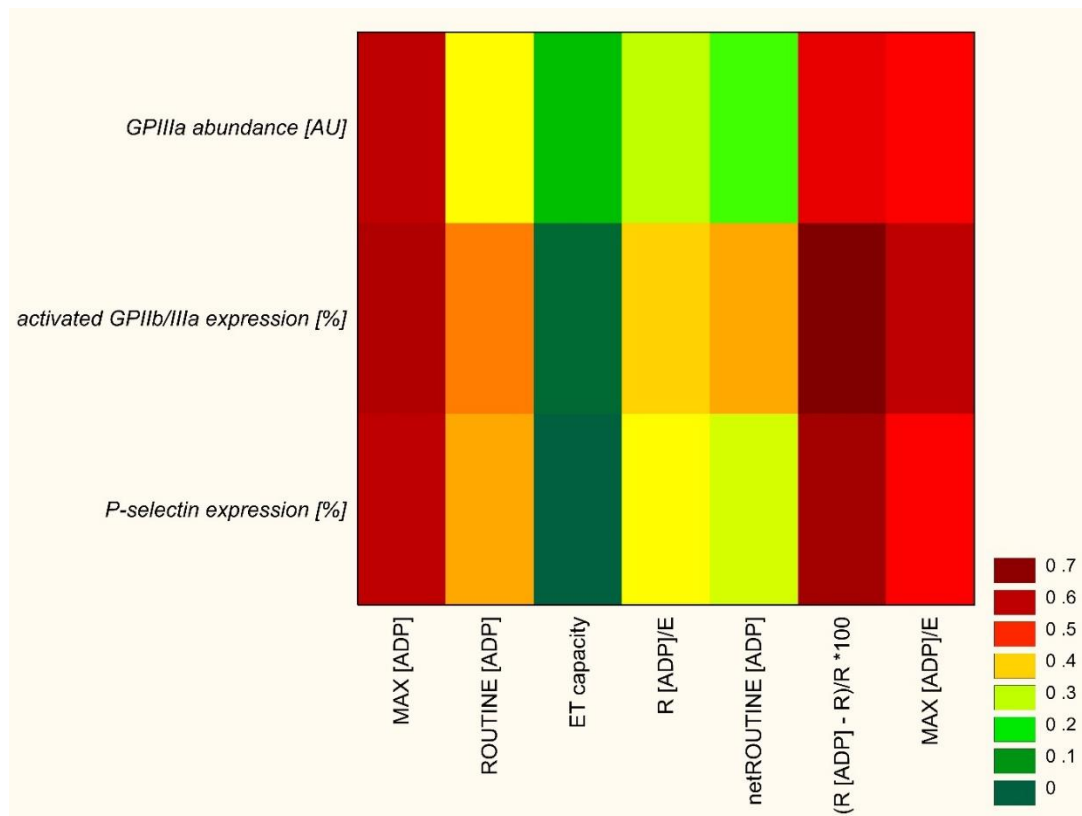

**Figure S3.** The “heatmap” representing the associations between variables describing blood platelet activation and mitochondrial respiration markers for blood platelets from healthy donors incubated with increasing concentrations of ADP.

Blood was collected on sodium citrate. Isolated platelets were resuspended in plasma/MiR05 combination. Details in Study design, subsection d. The “heatmap” constructed with the use of a sequential discrete contour line plot based on the bootstrap-boosted overall Spearman correlation coefficients (RS); the  $|RS|$  values  $> 0.300$  remained significant with at least  $P < 0.05$  (for more details see the legend to Table 5 in in paragraph 3.4 were numerical values were presented).
